# Supplementary material for: Synthesis of mesoporous carbon spheres via a soft-template route for catalyst supports in PEMFC cathodes
Source: Royal Society of Chemistry journal article supplement (doi:10.1039/d1sm00450f), 2021-01-01
Supplement: d1sm00450f1.pdf [file d1sm00450f1.pdf]

## Supplementary information

### Synthesis of mesoporous carbon spheres via soft-template route for catalyst support in PEMFC cathode

Hassan Javed<sup>a</sup>, Shubashree Pani<sup>a</sup>, Jithin Antony<sup>a</sup>, Mariappan Sakthivel<sup>a</sup> and Jean-Francois Drillet<sup>a,\*</sup>

<sup>a</sup> DEHEMA-Forschungsinstitut, Theodor-Heuss-Allee 25, 60486 Frankfurt am Main, Germany

\* E-mail: jean.drillet@dechema.de

Table S1: Relative nitrogen and carbon compositions of C<sub>FAH</sub> sample analyzed by XPS

| System           | N 1s (%)  |         |           |         | C 1s (%)            |                     |     |     |       |         |     |
|------------------|-----------|---------|-----------|---------|---------------------|---------------------|-----|-----|-------|---------|-----|
|                  | Pyridinic | Pyrolic | Graphitic | N-Oxide | sp <sup>2</sup> C-C | sp <sup>3</sup> C-C | C-O | C-N | O-C=O | O-C=O-N | π-π |
| C <sub>FAH</sub> | 21.3      | 54.2    | 15.5      | 9       | 20                  | 47.8                | 9.2 | 7   | 5.8   | 5.6     | 4.6 |

Table S2: Volume of pore type in carbon systems

| System              | Total*<br>V <sub>pore</sub><br>(cm <sup>3</sup> g <sup>-1</sup> ) | V <sub>pore</sub><br>(cm <sup>3</sup> g <sup>-1</sup> ) | V <sub>pore</sub><br>(%) |                   |    |
|---------------------|-------------------------------------------------------------------|---------------------------------------------------------|--------------------------|-------------------|----|
|                     | Micro <sup>#</sup>                                                | Meso <sup>+</sup>                                       | Micro <sup>#</sup>       | Meso <sup>+</sup> |    |
| C <sub>FRH</sub>    | 0.3                                                               | 0.23                                                    | 0.07                     | 77                | 23 |
| C <sub>FAH</sub>    | 0.5                                                               | 0.27                                                    | 0.23                     | 54                | 46 |
| C <sub>Vulcan</sub> | 0.31                                                              | 0.06                                                    | 0.25                     | 20                | 80 |

\* cumulative pore volume  
<sup>#</sup> pores in range between 0.7 and 2 nm (supermicro according to IUPAC)  
<sup>+</sup> pores in the range between 2 and 36 nm

### N<sub>2</sub> physisorption isotherm of carbon powders:

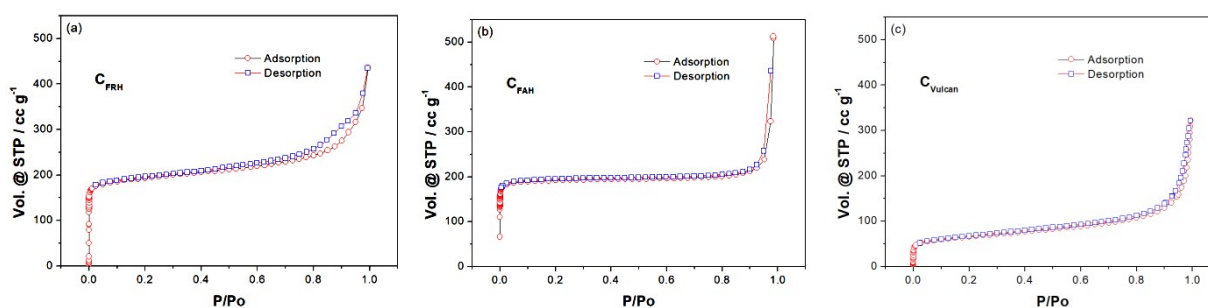

Fig S1. BET adsorption/desorption isotherms of as-prepared carbon (a) FRH, (b) FAH and (c) Vulcan.

### ADT cycles under RRDE:

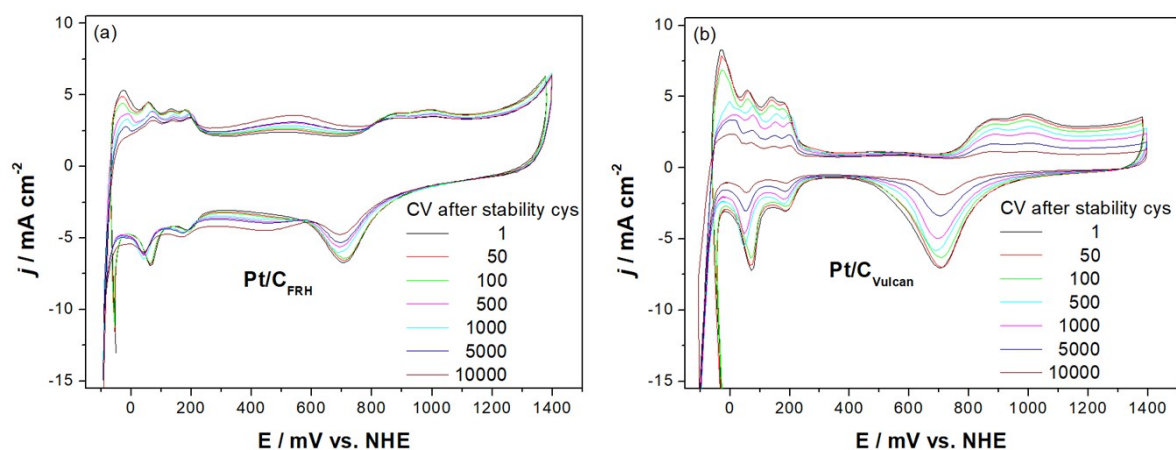

**Fig. S2:** CVs of 40 wt% (a) Pt/C<sub>FRH</sub> (b) Pt/C<sub>Vulcan</sub> ( $80 \mu\text{g}_{\text{Pt}} \text{cm}^{-2}$ ) catalyst on glassy carbon RRDE cell during ADT in N<sub>2</sub>-saturated 0.5 M H<sub>2</sub>SO<sub>4</sub> at  $1 \text{ V s}^{-1}$  and room temperature.

### ADT cycles of GDEs:

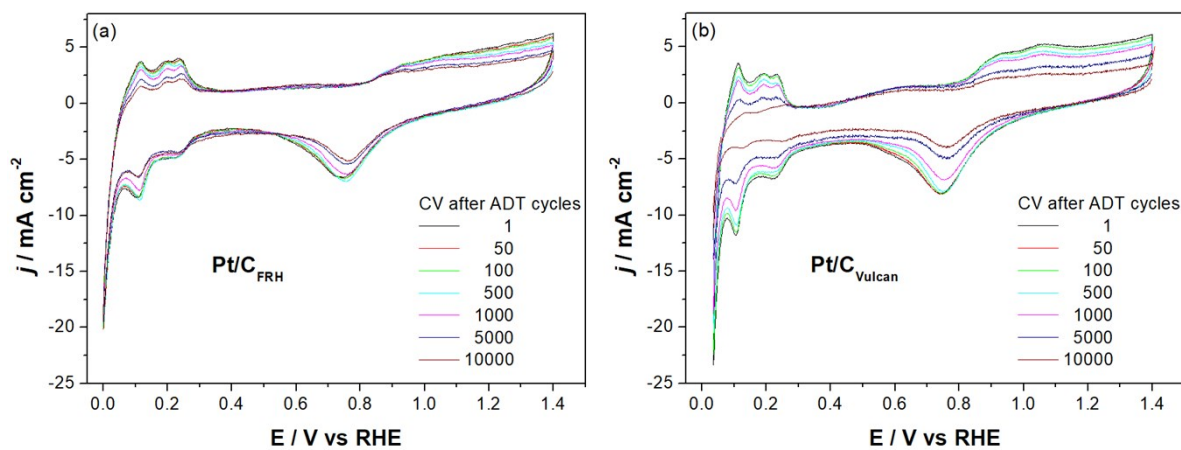

**Fig. S3:** CVs of 40 wt% (a) Pt/C<sub>FRH</sub> (b) Pt/C<sub>Vulcan</sub> ( $0.25 \text{ mg}_{\text{Pt}} \text{cm}^{-2}$ ) GDE during ADT in N<sub>2</sub>-saturated 0.5 M H<sub>2</sub>SO<sub>4</sub> at  $1 \text{ V s}^{-1}$  and room temperature.
